# Supplementary material for: Small extracellular vesicles containing arginase-1 suppress T-cell responses and promote tumor growth in ovarian carcinoma
Source: PubMed Central journal article supplement (PMC6611910; doi:10.1038/s41467-019-10979-3), 2019-07-05
Supplement: 41467_2019_10979_MOESM1_ESM.pdf [file 41467_2019_10979_MOESM1_ESM.pdf]

Small extracellular vesicles containing arginase 1 suppress T-cell responses and promote tumor growth in ovarian carcinoma

Malgorzata Czystowska-Kuzmich, et al.

Supplementary Table 1: Clinicopathological characteristics of the OvCa patients (all diagnosed with high-grade serous adenocarcinoma) and NC enrolled in the study evaluating arginase expression in primary OvCa by immunohistochemistry (IHC). IHC was performed in 84 samples

|                               | FREQUENCY | PERCENT |
|-------------------------------|-----------|---------|
| <b>MENOPAUSAL STATUS</b>      |           |         |
| pre-menopausal                | 29        | 33.3    |
| post menopausal               | 58        | 66.7    |
| TOTAL                         | 87        | 100.0   |
| <b>FIGO-stage</b>             |           |         |
| I (IA, IB, IC)                | 37        | 42.5    |
| II (IIA, IIB, IIC)            | 10        | 11.5    |
| III-IV (IIIA, IIIB, IIIC, IV) | 40        | 45.0    |
| TOTAL                         | 87        | 100.0   |
| <b>DIAGNOSIS</b>              |           |         |
| serous                        | 40        | 46.0    |
| endometroid                   | 29        | 33.3    |
| clear cell                    | 6         | 6.9     |
| transitional                  | 4         | 4.6     |
| mucinous                      | 4         | 4.6     |
| undifferentiated              | 4         | 4.6     |
| TOTAL                         | 87        | 100.0   |
| <b>GRADING</b>                |           |         |
| G1                            | 5         | 5.7     |
| G2                            | 13        | 15.0    |
| G3                            | 69        | 79.3    |
| TOTAL                         | 87        | 100.0   |
| <b>CYTOREDUCTION</b>          |           |         |
| optimal                       | 34        | 39.0    |
| non-optimal                   | 53        | 61.0    |
| TOTAL                         | 87        | 100.0   |
| <b>RECURRENCE</b>             |           |         |
| no recurrence                 | 19        | 21.8    |
| recurrence                    | 61        | 70.1    |
| no remission                  | 7         | 8.1     |
| TOTAL                         | 87        | 100.0   |
| <b>VITAL STATUS</b>           |           |         |
| alive                         | 34        | 39.1    |
| dead                          | 52        | 59.8    |
| unknown                       | 1         | 1.1     |
| TOTAL                         | 87        | 100.0   |

Supplementary Table 2: Results of ARG1 levels evaluation with immunohistochemistry (n = 84) shown as percentages of cells of different staining intensities and the calculated ARG scores<sup>1</sup>

| Pat No | ARG 3+ | ARG 2+ | ARG 1+ | ARG neg | ARG score |
|--------|--------|--------|--------|---------|-----------|
| 1      | 70     | 30     | 10     | 0       | 280       |
| 2      | 80     | 20     | 0      | 0       | 280       |
| 3      | 80     | 20     | 0      | 0       | 280       |
| 4      | 40     | 60     | 0      | 0       | 240       |
| 5      | 40     | 50     | 10     | 0       | 230       |
| 6      | 20     | 70     | 10     | 0       | 210       |
| 7      | 20     | 60     | 20     | 0       | 200       |
| 8      | 0      | 100    | 0      | 0       | 200       |
| 9      | 0      | 100    | 0      | 0       | 200       |
| 10     | 20     | 60     | 20     | 0       | 200       |
| 11     | 10     | 70     | 20     | 0       | 190       |
| 12     | 10     | 60     | 30     | 0       | 180       |
| 13     | 0      | 80     | 20     | 0       | 180       |
| 14     | 0      | 80     | 20     | 0       | 180       |
| 15     | 0      | 70     | 30     | 0       | 170       |
| 16     | 0      | 70     | 30     | 0       | 170       |
| 17     | 0      | 70     | 30     | 10      | 170       |
| 18     | 0      | 70     | 30     | 0       | 170       |
| 19     | 0      | 80     | 10     | 0       | 170       |
| 20     | 0      | 70     | 30     | 0       | 170       |
| 21     | 0      | 70     | 30     | 10      | 170       |
| 22     | 0      | 70     | 30     | 0       | 170       |
| 23     | 0      | 60     | 40     | 0       | 160       |
| 24     | 0      | 60     | 40     | 10      | 160       |
| 25     | 0      | 60     | 40     | 0       | 160       |
| 26     | 0      | 60     | 40     | 0       | 160       |
| 27     | 0      | 70     | 20     | 10      | 160       |
| 28     | 0      | 60     | 30     | 10      | 150       |

| Pat No | ARG 3+ | ARG 2+ | ARG 1+ | ARG neg | ARG score |
|--------|--------|--------|--------|---------|-----------|
| 29     | 0      | 60     | 30     | 10      | 150       |
| 31     | 0      | 60     | 30     | 0       | 150       |
| 35     | 0      | 30     | 70     | 0       | 130       |
| 36     | 10     | 20     | 60     | 10      | 130       |
| 37     | 0      | 30     | 70     | 0       | 130       |
| 38     | 0      | 20     | 80     | 0       | 120       |
| 39     | 0      | 30     | 60     | 10      | 120       |
| 40     | 0      | 20     | 80     | 0       | 120       |
| 41     | 0      | 20     | 80     | 0       | 120       |
| 42     | 0      | 20     | 80     | 0       | 120       |
| 43     | 0      | 30     | 60     | 10      | 120       |
| 44     | 0      | 20     | 70     | 10      | 110       |
| 45     | 0      | 20     | 70     | 0       | 110       |
| 46     | 0      | 20     | 70     | 10      | 110       |
| 47     | 0      | 30     | 40     | 30      | 100       |
| 48     | 0      | 0      | 100    | 0       | 100       |
| 49     | 0      | 0      | 100    | 0       | 100       |
| 50     | 0      | 0      | 100    | 0       | 100       |
| 51     | 0      | 0      | 100    | 0       | 100       |
| 52     | 0      | 0      | 100    | 0       | 100       |
| 53     | 0      | 10     | 80     | 10      | 100       |
| 54     | 0      | 0      | 100    | 0       | 100       |
| 55     | 0      | 20     | 60     | 20      | 100       |
| 56     | 0      | 0      | 100    | 0       | 100       |
| 57     | 0      | 0      | 100    | 0       | 100       |
| 58     | 0      | 20     | 60     | 20      | 100       |
| 59     | 0      | 10     | 70     | 20      | 90        |
| 60     | 0      | 10     | 70     | 20      | 90        |
| 61     | 0      | 10     | 70     | 10      | 90        |
| 62     | 0      | 20     | 40     | 40      | 80        |
| 63     | 0      | 0      | 80     | 20      | 80        |

| 64            | 0      | 0      | 80     | 20      | 80            |
|---------------|--------|--------|--------|---------|---------------|
| Pat nr.       | ARG 3+ | ARG 2+ | ARG 1+ | ARG neg | ARG score     |
| 65            | 0      | 0      | 80     | 20      | 80            |
| 66            | 0      | 0      | 80     | 20      | 80            |
| 69            | 0      | 0      | 80     | 20      | 80            |
| 70            | 0      | 0      | 80     | 20      | 80            |
| 71            | 0      | 0      | 70     | 30      | 70            |
| 72            | 0      | 0      | 70     | 30      | 70            |
| 73            | 0      | 0      | 70     | 30      | 70            |
| 74            | 0      | 0      | 70     | 30      | 70            |
| 75            | 0      | 0      | 70     | 30      | 70            |
| 76            | 0      | 0      | 60     | 40      | 60            |
| 77            | 0      | 0      | 60     | 20      | 60            |
| 78            | 0      | 0      | 60     | 40      | 60            |
| 79            | 0      | 0      | 60     | 40      | 60            |
| 80            | 0      | 0      | 50     | 50      | 50            |
| 81            | 0      | 0      | 50     | 50      | 50            |
| 82            | 0      | 0      | 50     | 50      | 50            |
| 83            | 0      | 0      | 50     | 50      | 50            |
| 84            | 0      | 0      | 20     | 80      | 20            |
| <b>mean</b>   |        |        |        |         | <b>126,79</b> |
| <b>median</b> |        |        |        |         | <b>120</b>    |
| <b>SD</b>     |        |        |        |         | <b>55,97</b>  |
| <b>min</b>    |        |        |        |         | <b>20</b>     |
| <b>max</b>    |        |        |        |         | <b>280</b>    |

<sup>1</sup> The staining intensity was independently determined empirically by two qualified pathologists and defined as follows: negative (ARG neg), weak (ARG 1+), moderate (ARG 2+) and strong (ARG 3+). The ARG scores were calculated as follows: ARG score = [% positive cells x 3 (strong intensity)] + [% positive cells x 2 (moderate intensity)] + [% positive cells x 1 (weak intensity)].

Supplementary Table 3: Clinicopathological characteristics of the patients enrolled in the study evaluating arginase activity in plasma (n = 81, all diagnosed with high-grade serous adenocarcinoma)

|                               | FREQUENCY | PERCENT |
|-------------------------------|-----------|---------|
| <b>OvCa-patients:</b>         |           |         |
| <b>MENOPAUSAL STATUS</b>      | 18        | 22.2    |
| pre-menopausal                | 63        | 77.8    |
| post menopausal               | 81        | 100.0   |
| TOTAL                         |           |         |
| <b>FIGO-stage</b>             |           |         |
| I (IA, IB, IC)                | 16        | 19.8    |
| II (IIA, IIB, IIC)            | 16        | 19.8    |
| III-IV (IIIA, IIIB, IIIC, IV) | 49        | 60.4    |
| TOTAL                         | 81        | 100.0   |
| <b>Normal controls:</b>       |           |         |
| <b>MENOPAUSAL STATUS</b>      |           |         |
| pre-menopausal                | 3         | 30.0    |
| post menopausal               | 7         | 70.0    |
| TOTAL                         | 10        | 100.0   |
| <b>DISEASE</b>                |           |         |
| uterine fibroids              | 5         | 50.0    |
| serous cystadenomas           | 5         | 50.0    |
| TOTAL                         | 10        | 100.0   |

Supplementary Table 4: Arginase activity [U L<sup>-1</sup>] measured in plasma of OvCa patients and non-OvCa patients (the negative control, NC) at the time of diagnosis

| <b>ARG activity [U L<sup>-1</sup>]</b> | <b>NC<br/>n = 10</b> | <b>Stage I<br/>n = 16</b> | <b>Stage II<br/>n = 16</b> | <b>Stage III<br/>n = 49</b> |
|----------------------------------------|----------------------|---------------------------|----------------------------|-----------------------------|
| <b>mean</b>                            | 2.29                 | 5.08                      | 9.27                       | 10.74                       |
| <b>median</b>                          | 2.43                 | 4.02                      | 7.18                       | 9.56                        |
| <b>SD</b>                              | 1.24                 | 2.92                      | 5.55                       | 6.31                        |
| <b>min</b>                             | 0.6                  | 1.98                      | 3.18                       | 2.59                        |
| <b>max</b>                             | 4.23                 | 12.06                     | 21.17                      | 29.39                       |

Supplementary Table 5: Human ovarian cancer cell lines used in the study

| <b>Cell line</b> | <b>type</b>            | <b>source</b>                                                                                                                  |
|------------------|------------------------|--------------------------------------------------------------------------------------------------------------------------------|
| OVCAR-3          | ovarian adenocarcinoma | Dr. S. Khlif, NIH, USA                                                                                                         |
| AD10             | ovarian adenocarcinoma | Dr. S. Khlif, NIH, USA                                                                                                         |
| A2780            | ovarian adenocarcinoma | ATCC                                                                                                                           |
| Skov3            | ovarian adenocarcinoma | ATCC                                                                                                                           |
| CaOv-3           | ovarian adenocarcinoma | ATCC                                                                                                                           |
| MDAH2774         | ovarian adenocarcinoma | ATCC                                                                                                                           |
| OvCa-14          | ovarian adenocarcinoma | Dr. M. Siedlar, Jagiellonian University Medical College, Cracow, Poland                                                        |
| OVP-10           | ovarian adenocarcinoma | Dr. B. Szaniawska, Cell Biology Dept., Maria-Sklodowska-Curie Memorial Cancer Center and Institute of Oncology, Warsaw, Poland |

The cell lines were not authenticated.



Supplementary Table 6: Primary and secondary antibodies used in the study, n/a: not available

| Primary antibodies                |             |              |          |                    |                |             |
|-----------------------------------|-------------|--------------|----------|--------------------|----------------|-------------|
| Protein                           | Clone       | Appli-cation | Dilution | Source             | Catalog number | Lot number  |
| Human/mouse ARG1                  | polyclonal  | WB           | 1:2000   | GeneTex            | GTX109242      | 42263       |
| Human/mouse ARG2                  | polyclonal  | WB           | 1:500    | Santa Cruz         | sc-20151       | E2913       |
| Human ARG1                        | polyclonal  | IHC          | 1:100    | Abcam              | ab128548       | n/a         |
| Human/mouse Tsg-101               | polyclonal  | WB           | 1:500    | Abcam              | ab30871        | GR192446-1  |
| Human/mouse CD63                  | MX-49.129.5 | WB           | 1:400    | Abcam              | ab193349       | LO811       |
| EpCAM                             | EBA-1       | WB           | 1:300    | Santa Cruz         | sc-66020       | A2711       |
| mouse CD9                         | polyclonal  | WB           | 1:1000   | Bioss              | bs-2489R       | n/a         |
| Human CD81                        | M38         | WB           | 1:1000   | Invitrogen         | 10630D         | 527190      |
| V5                                | D3H8Q       | WB           | 1:1000   | Cell Signalling    | 13202S         | 2           |
| Human/mouse $\beta$ -actin        | AC-15       | WB           | 1:10 000 | Santa Cruz         | A5060          | n/a         |
| Human CD4-PerCP/Cy5.5.            | OKT4        | FC           | 1:200    | Biolegend          | 300530         | B210111     |
| Human CD8-PerCP/Cy5.5             | RPA-T8      | FC           | 1:200    | Biolegend          | 301032         | B209727     |
| Human EpCAM-PE                    | 9C4         | FC           | 1:200    | Biolegend          | 324206         | B161699     |
| Human CD3 $\epsilon$ -FITC        | HIT3a       | FC           | 1:200    | eBiosciences       | 555339         | 5357931     |
| Human CD3 $\zeta$ -PE             | 6B10.2      | FC           | 1:200    | eBiosciences       | 12-2479        | 4291757     |
| Mouse CD4-PerCp/Cy5.5             | RM4-5       | FC           | 1:200    | eBiosciences       | 45-0042-82     | 4299174     |
| Mouse CD4-APC                     | GK1.5       | FC           | 1:200    | eBiosciences       | 17-0041-82     | E07037-1638 |
| Mouse CD8 $\alpha$ -PerCP/Cy5.5   | 53-6.7      | FC           | 1:200    | eBiosciences       | 45-0081-82     | 4291993     |
| Human CD9-FITC                    | ALB6        | FC           | 1:5      | Beckman Coulter    | IM1755U        | 40          |
| Human CD81-APC                    | JS64        | FC           | 1:5      | Beckman Coulter    | A87789         | 23          |
| Human CD63-PE                     | H5C6        | FC           | 1:5      | BD Biosciences     | 558020         | 8235819     |
| Human/mouse ARG1-PE               | polyclonal  | FC           | 1:300    | R&D Systems        | IC5868P        | ADBB0516121 |
| Mouse CD69-PE-Cy7                 | H1.2F3      | FC           | 1:100    | eBiosciences       | 25-0691        | 4291385     |
| Mouse CD11c-eF450                 | N418        | FC           | 1:200    | eBiosciences       | 48-0114        | E01232-1633 |
| Mouse CD3 $\epsilon$ -APC         | 17A2        | FC           | 1:200    | eBiosciences       | 17-0032        | 4302818     |
| Mouse MHCII-PE-Cy7                | M5/114.15.2 | FC           | 1:800    | eBiosciences       | 25-5321-80     | 4321424     |
| Mouse CD45.2-V500                 | 104         | FC           | 1:000    | BD                 | 562129         | 5107958     |
| V5-FITC                           | polyclonal  | FC           | 1:200    | Abcam              | Ab1274         | GR263967-1  |
| H2-Kb OVA (SIINFEKL)-PE tetramers |             | FC           | 1:50     | MBL Intl           | T03000         | T1708003    |
| Secondary antibodies              |             |              |          |                    |                |             |
| TrueBlot Anti-mouse Ig-HRP        | polyclonal  | WB           | 1:1000   | Rockland           | p/n 18-8817-33 | 37199       |
| TrueBlot Anti-rabbit Ig-HRP       | polyclonal  | WB           | 1:1000   | Rockland           | p/n 18-8816-33 | 37203       |
| Anti-mouse Ig-HRP                 | polyclonal  | WB           | 1:10000  | Jackson Immunores. | 715-035-150    | 107137      |
| Anti-rabbit Ig-HRP                | polyclonal  | WB           | 1:10000  | Jackson Immunores. | 111-035-003    | 108097      |
| Anti-rabbit Ig-HRP                | polyclonal  | IHC          | 1:1000   | Dako Agilent       | P 0448         | n/a         |

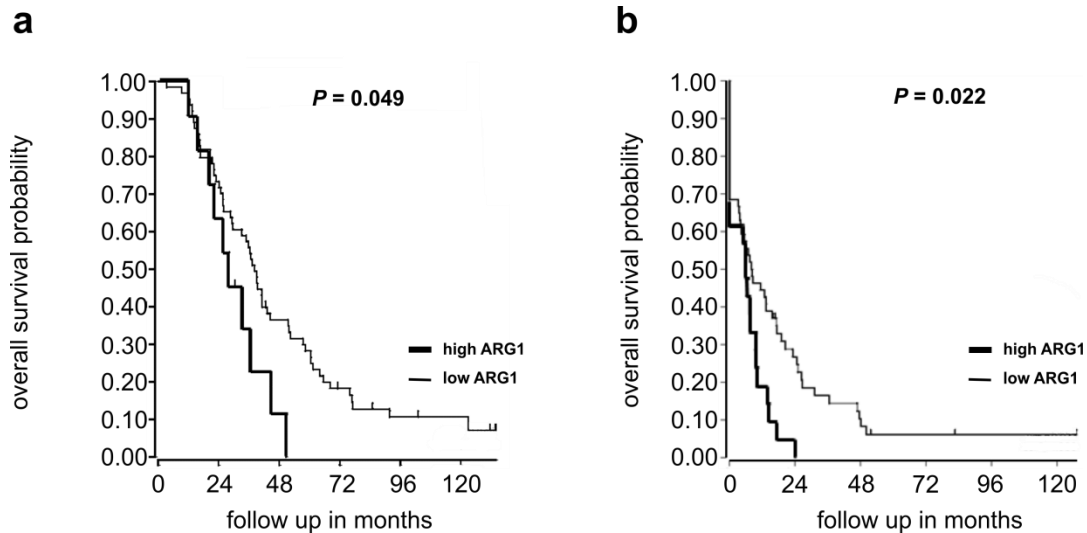

**Supplementary figure 1.** Transcriptomic analysis of ARG1 expression in patients with OvCa. Kaplan-Meier survival curves of 75 serous OvCa patients from the Pamuła-Piłat-101 MAS5.0-u133p2 data set (GEO accession nr. GSE63885) divided according to ARG1 gene expression. For overall survival the expression cutoff was set at 3.2 and for event free survival at 1.9 by log-rank test. **a** High ARG1 expression (n=11) is associated with a worse overall survival in comparison to low (n=64) ARG1 expression ( $P=0.049$ ). **b** High ARG1 expression (n=21) is associated with a worse event free survival in comparison to low (n=54) ARG1 expression ( $P=0.022$ ). All data is analyzed in accordance with the public Versteeg database 'R2: microarray analysis and visualization platform' (<http://r2.aml.nl>).

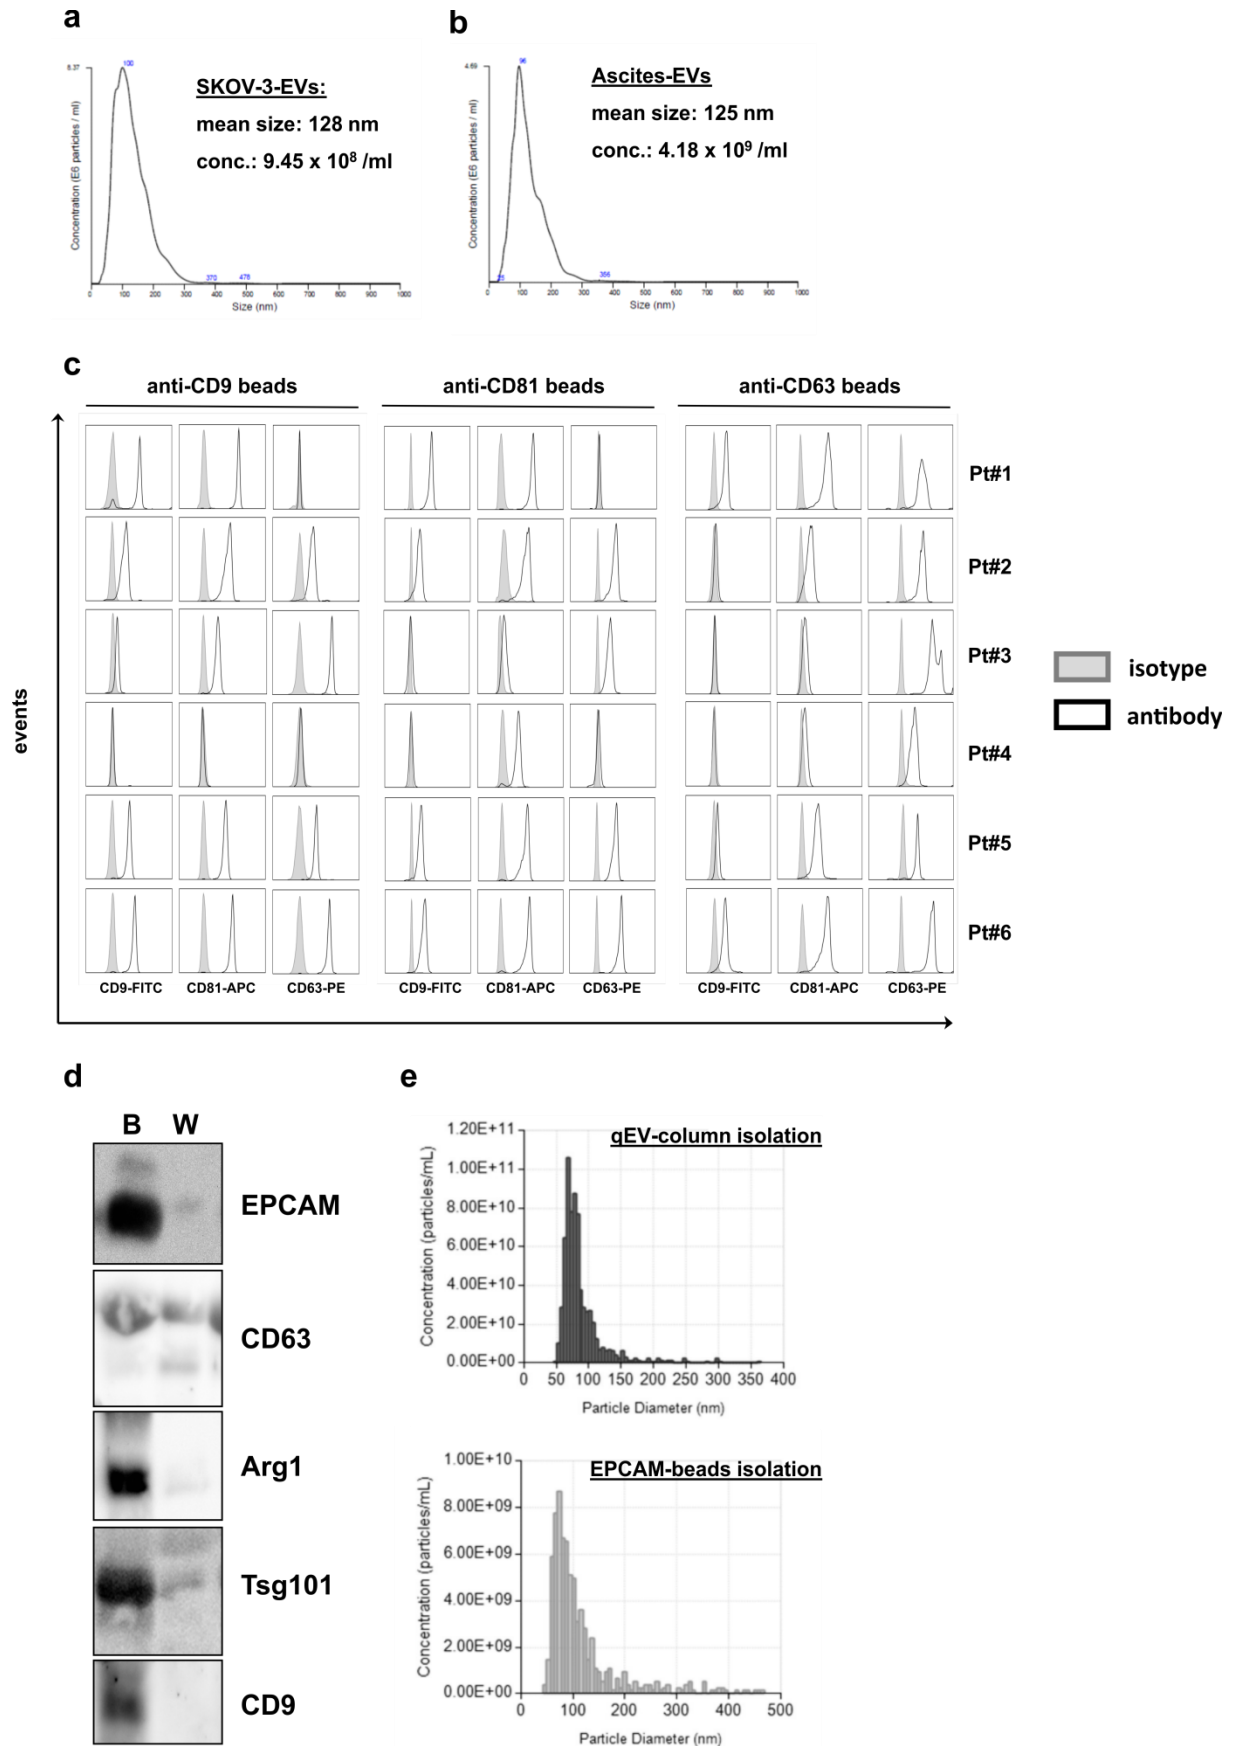

**Supplementary Figure 2.** Isolation and characterization of OvCa-TEX. Representative example of concentration and size distribution of OvCa EVs isolated

by sequential centrifugation from the supernatant of an OvCa cell line **a** and from patient's ascites **b** as measured by nanoparticle tracking analysis (NTA). **c** The presence of typical exosomal tetraspanins determined by flow cytometry on EVs. Distinct EVs-subtypes were immuno-captured from concentrated total EVs pre-enriched from ascites by sequential centrifugation using beads coated with anti-CD9, anti-CD81 or anti-CD63. **d** EVs were isolated from ascites with anti-EPCAM coated magnetic beads (Miltenyi). Expression of EPCAM, ARG1 and typical exosomal markers (CD63, Tsg101, CD9) in the bead-bound fraction (B) determined by Western blotting. The fraction obtained after column wash (W) was used as control. **e** Size and concentration measurements by Tunable Resistive Pulse Sensing (TRPS: Izon qNano) of EVs isolated from ascites by size-exclusion chromatography using a qEV-column (upper panel) and EPCAM-beads (lower panel).

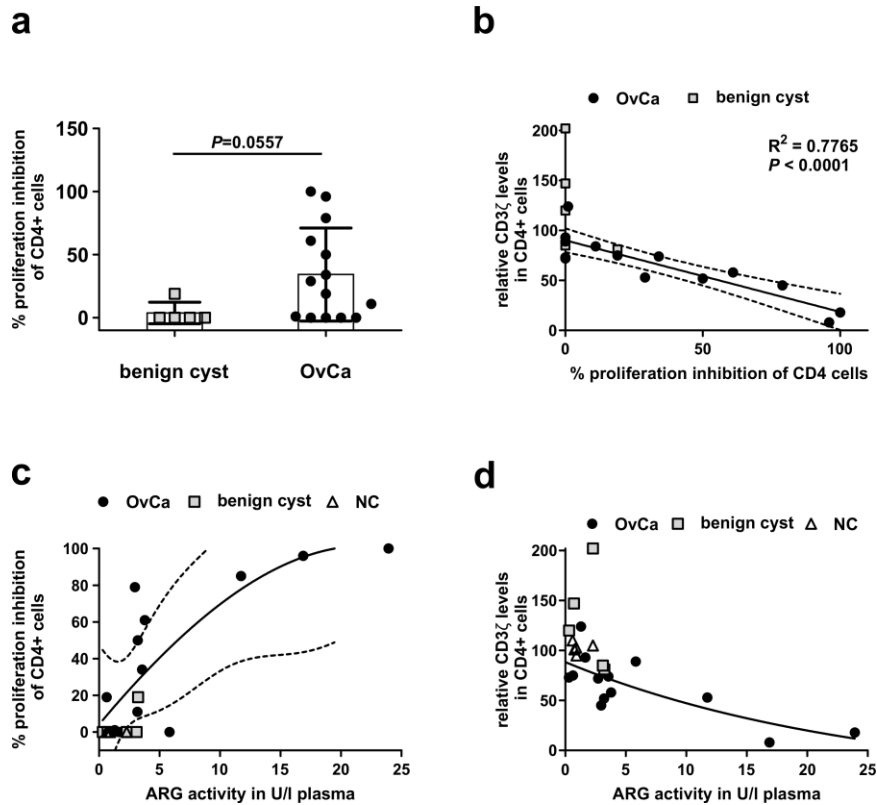

**Supplementary Figure 3.** EVs-ARG1 inhibit proliferation of CD4<sup>+</sup> T-cells. **a** Percent of proliferation inhibition of peripheral blood CD4<sup>+</sup> T-cells in n=14 OvCa patients and n=5 patients with benign ovarian cyst normalized to the mean proliferation of n=5 healthy controls. Data show means  $\pm$  SD,  $P$  value calculated in Mann-Whitney U test. **b** Correlation between the peripheral blood CD4<sup>+</sup> T-cell proliferation inhibition and CD3 $\zeta$  levels.  $R^2$  value and  $P$  value (Mann-Whitney U test) were calculated with GraphPad Prism 6.0. Dotted lines mark the 95% confidence intervals. **c** Percentages of peripheral blood CD4<sup>+</sup> cells proliferation inhibition as a function of ARG activity in plasma of n=14 OvCa patients and n=5 patients with benign cyst of the ovary. Dotted lines mark 95% confidence intervals. **d** CD3 $\zeta$  levels evaluated in flow cytometry as a function of ARG activity in the plasma of n=14 OvCa patients and n=5 patients with benign cyst of the ovary.

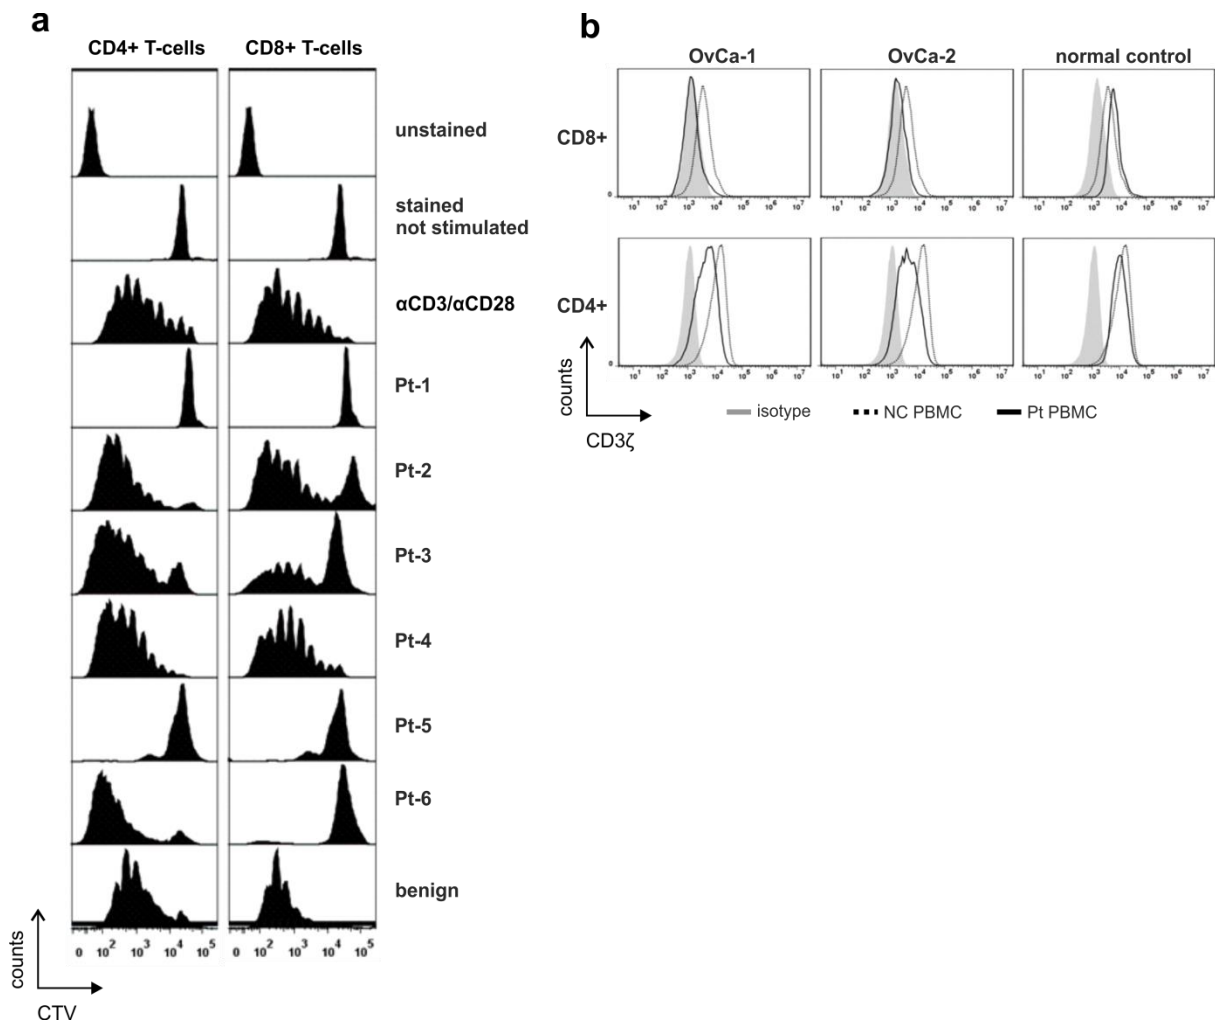

**Supplementary Figure 4.** Peripheral T-cells of OvCa patients show decrease proliferation capability and CD3 $\zeta$  expression. **a** Proliferation histograms of the CD4<sup>+</sup> (left panel) and CD8<sup>+</sup> (right panel) T-cell fraction of PBMCs of 6 representative OvCa patients, showing different degree of proliferation inhibition in comparison to T-cells of a healthy control and of a patient with benign disease. **b** Representative histograms of CD3 $\zeta$  chain expression in the CD8<sup>+</sup> (upper panel) and CD4<sup>+</sup> T-cell fraction (lower panel) of PBMCs of two OvCa patients and a patient with benign disease.

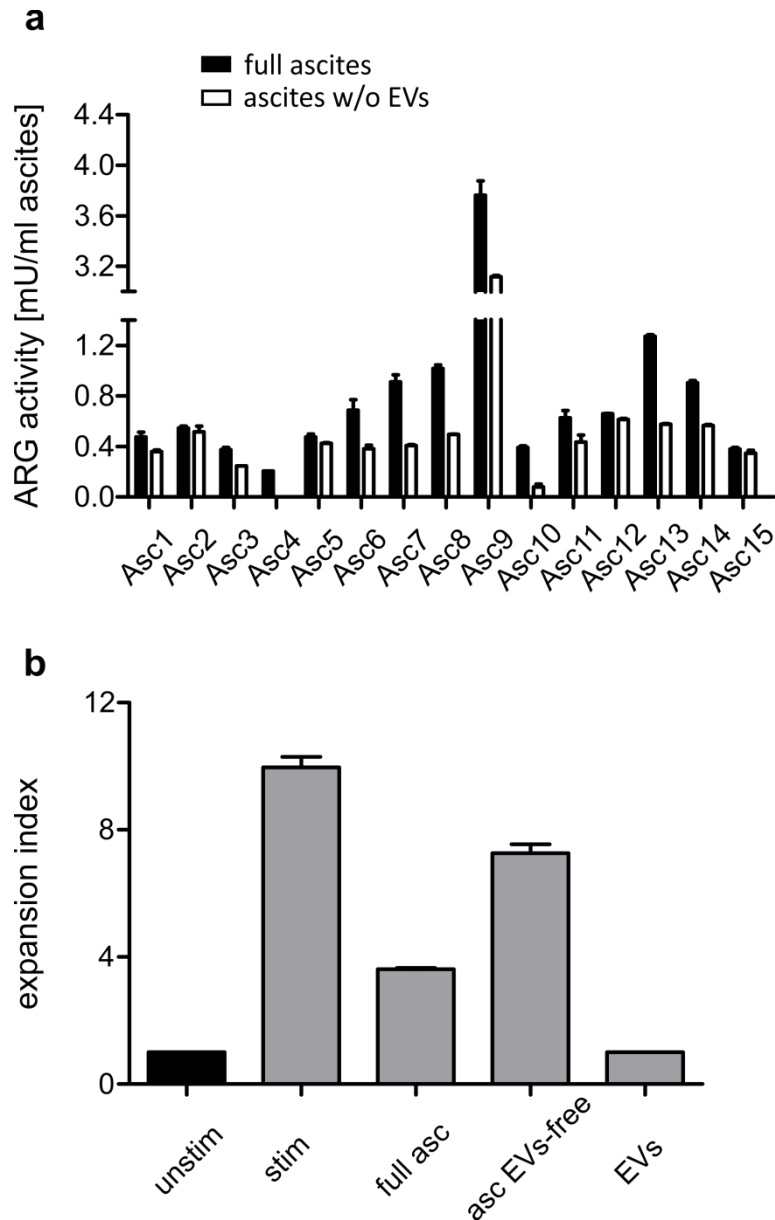

**Supplementary Figure 5.** Arginase activity and suppressive potential of OvCa ascites. **a** Arginase activity in full ascites or in the ascitic supernatant after removal of EVs by sequential centrifugation. Data show means  $\pm$  SD from duplicates. **b** Suppression of proliferation of  $\alpha$ CD3/ $\alpha$ CD28-stimulated CD8<sup>+</sup> T-cells cultured for 5 days in full ascites, the ascitic fraction obtained after removal of EVs (both 90% v/v) or in presence of EVs isolated from 2 ml of full ascites. Cell proliferation is expressed as expansion index, i.e. the fold-expansion of the responder cells, calculated by the FlowJow v7.6.5 software. Data show means  $\pm$  SD from duplicates.

**a**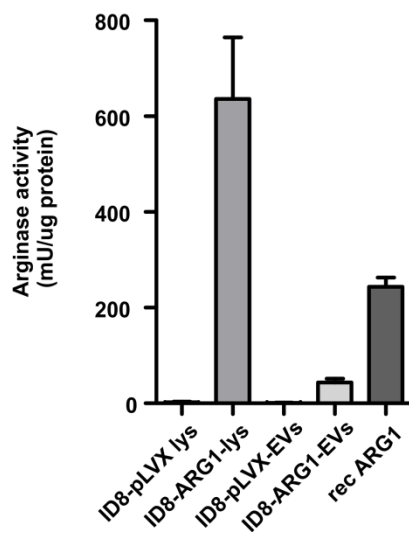**b**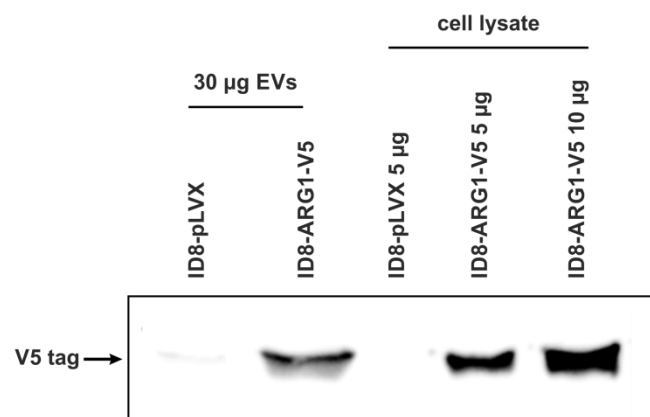

**Supplementary Figure 6.** Arginase activities and expression levels in ID8 cells. **a** Arginase activity in the lysates of ID8-pLVX and ID8-ARG1-V5 cells and in the corresponding EVs. Mean relative expression of 3 independent experiments (error bars, SD). **b** Immunoblotting for V5-tag in the lysates of ID8-pLVX and ID8-ARG1-V5 cells and the corresponding EVs.



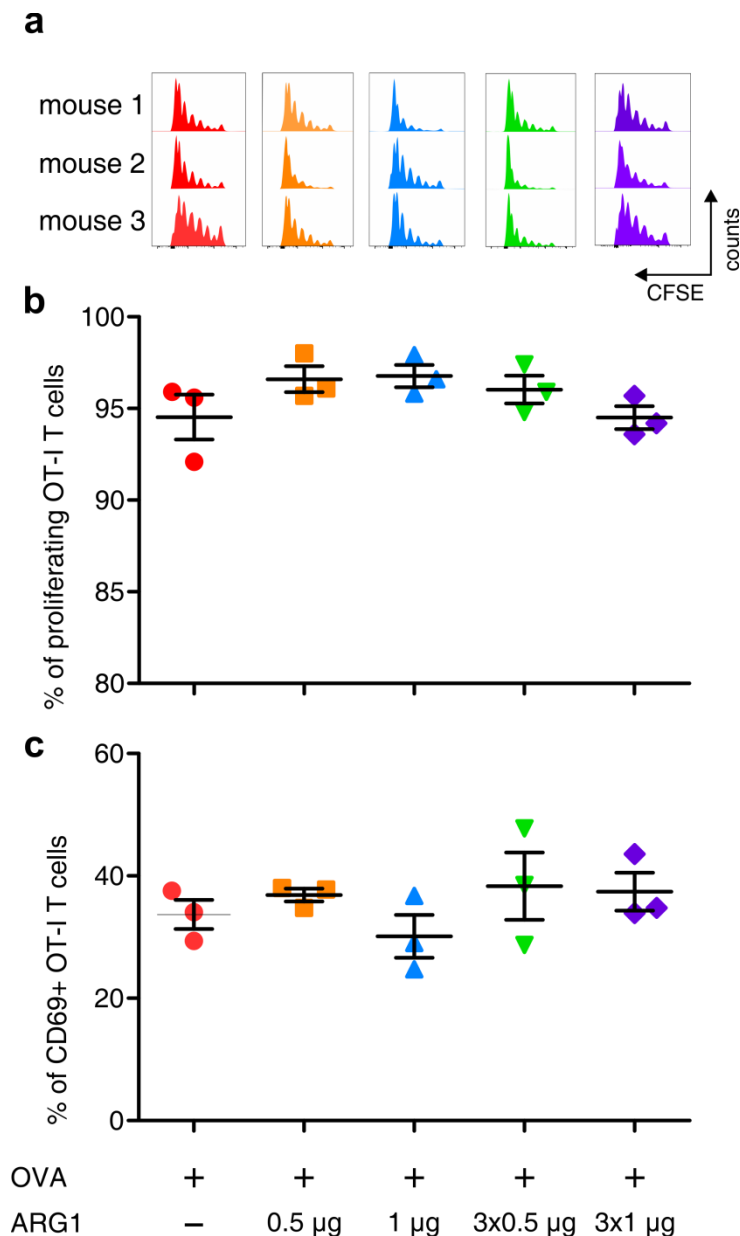

**Supplementary Figure 7.** Recombinant ARG1 fails to inhibit specific T-cell proliferation *in vivo*. OVA-specific, CFSE-stained CD8<sup>+</sup> T-cells ( $4 \times 10^6$  cells) isolated from OT-I mice were injected intravenously into C57BL/6 mice and 24 h after adoptive transfer 5  $\mu$ g of OVA protein  $\pm$  different amounts of recombinant murine ARG1 were injected s.c. into the right thigh. In some groups subcutaneous injections of recombinant ARG1 were repeated daily for the next two days. After 72 h CD8<sup>+</sup> T-cells were isolated from right inguinal lymph nodes, stained with SIINFEKL-tetramers and analyzed for proliferation by flow cytometry. Representative proliferation profiles **a** and percentages **b** of *in vivo* proliferating OT-I T-cells in the presence of recombinant ARG1 are shown. Data show means  $\pm$  SD. The gate was set on live, CD8<sup>+</sup> tetramer-positive T-cells. **c** Percentages of activated (CD69<sup>+</sup>) OT-I T-cells. Data show means  $\pm$  SD.

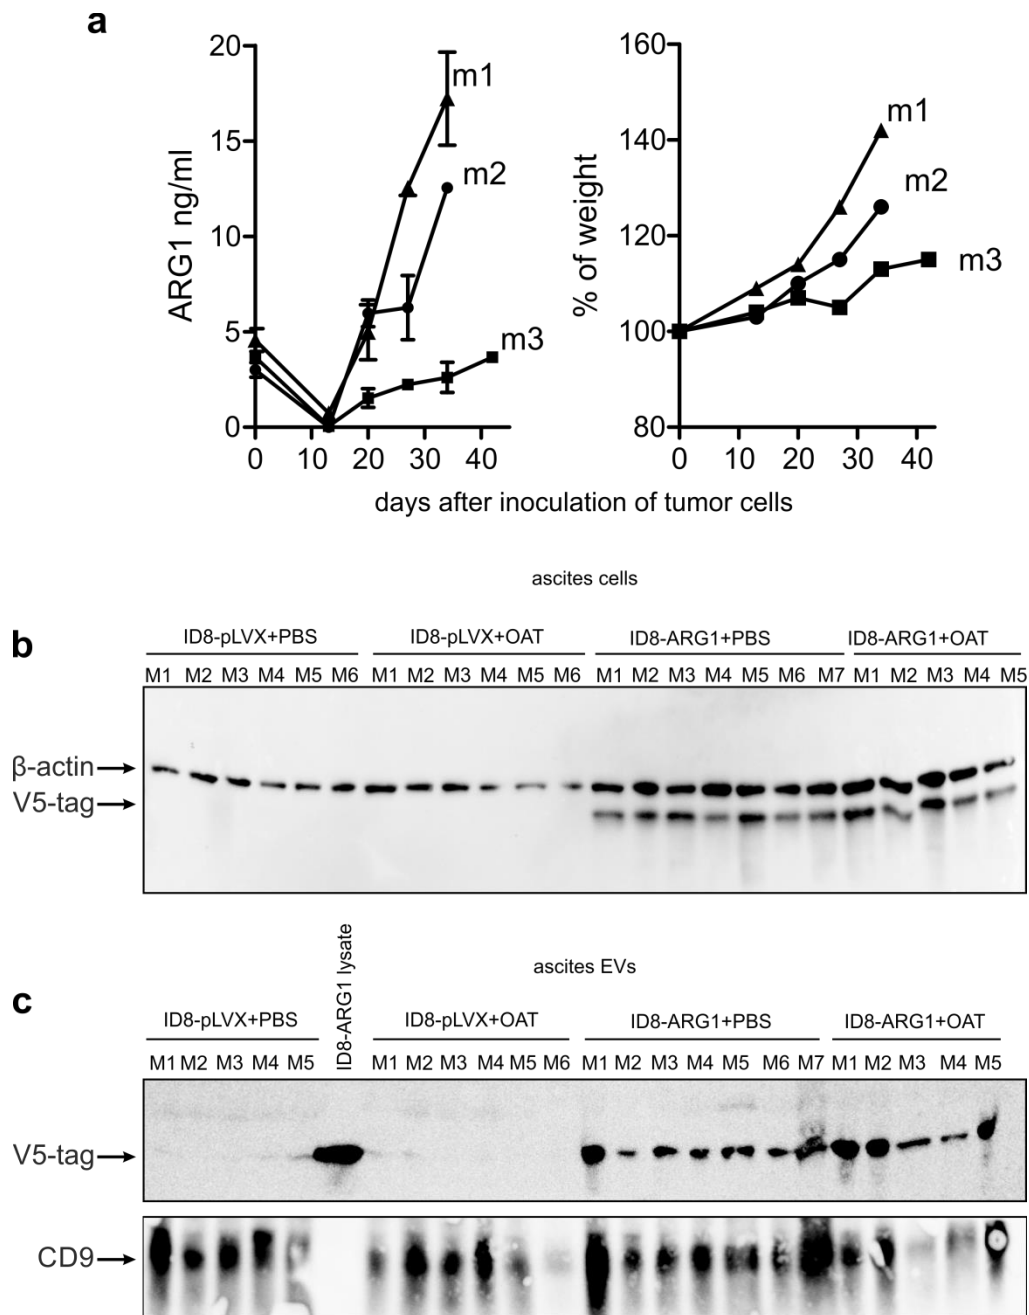

**Supplementary Figure 8.** ARG1-V5-tag-positive EVs and cells are detectable in ascites of ID8-ARG1 tumor-bearing mice. **a** ARG1 levels (left) in the plasma of 3 mice inoculated i.p. with  $4 \times 10^6$  ID8-ARG1 cells measured with ELISA and changes in mouse weight (right) in corresponding mice. **b** Immunoblotting for V5-tag (and  $\beta$ -actin used as a loading control) in cells isolated from the peritoneal cavity of mice inoculated with controls or ARG1-overexpressing ID8 cells. Ascites was collected 28 days after inoculation of tumor cells. Equal amounts of protein (10  $\mu$ g) were loaded per lane. **c** Immunoblotting for V5-tag (and CD9 used as a marker for the EV preparations) in the EVs isolated from peritoneal cavity. Equal amounts of protein (30  $\mu$ g) were loaded per lane (except for ID8-ARG1 lysate = 5  $\mu$ g).

**Proliferation analysis results  
generated by FlowJo Software  
v7.6.5:**

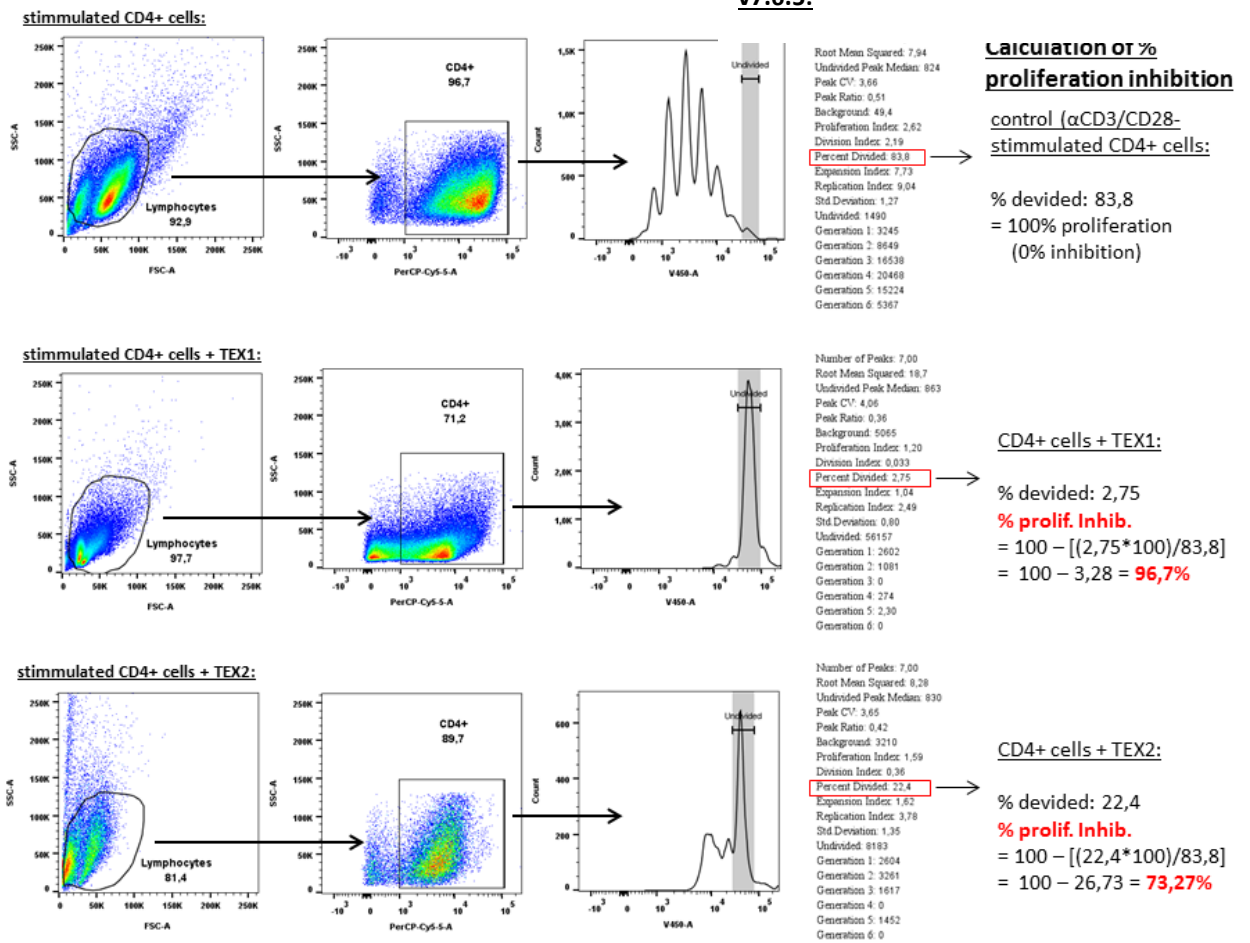

**Supplementary Figure 9.** Gating strategy used to analyze the data shown in Figure 3c, Figure 3d, Figure 3e, Figure 4, Supplementary Fig 3(a-d), Supplementary Fig 4, Supplementary Fig. 5b and Supplementary Fig. 7. Exemplary gating strategy used for the CD4<sup>+</sup> T-cell population (analogous strategy was used for the CD8<sup>+</sup> T-cell population). A minimum of 10 000 cells were acquired within the lymphocytes gate. Proliferation histograms were generated in FlowJo v7.6.5. Exemplary calculation of the percentage of proliferation inhibition based on the proliferation analysis in FlowJo v7.6.5.

### CD4+ T-cells:

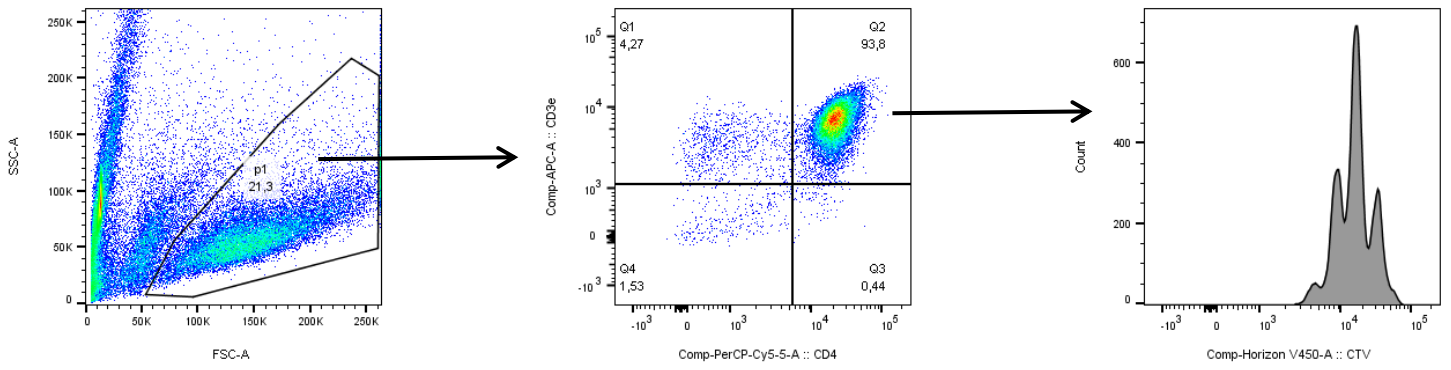

### CD8+ T-cells:

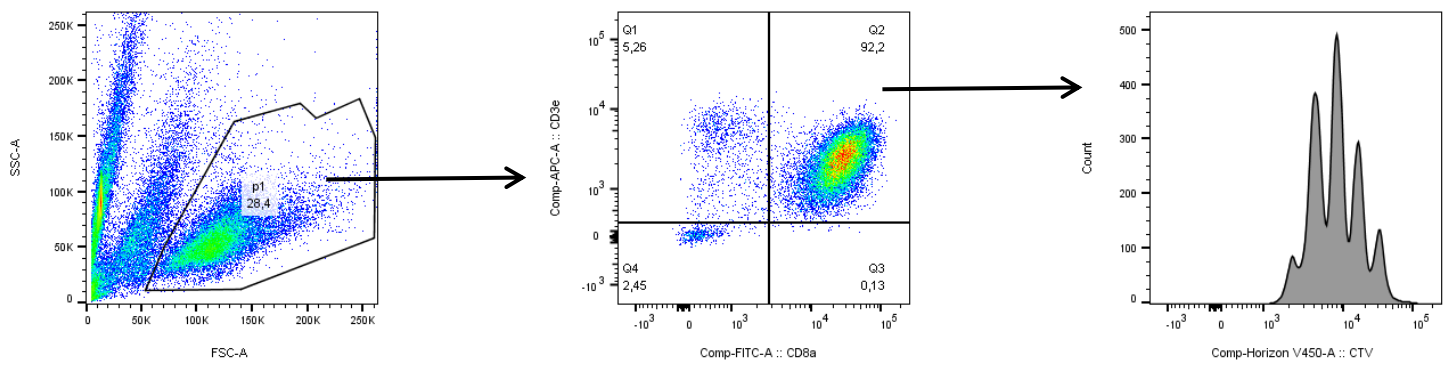

**Supplementary Figure 10.** Gating strategy used to analyze the data shown in Figure 5. A minimum of 10 000 cells were acquired within the lymphocytes gate. Proliferation histograms were generated in FlowJo v7.6.5.

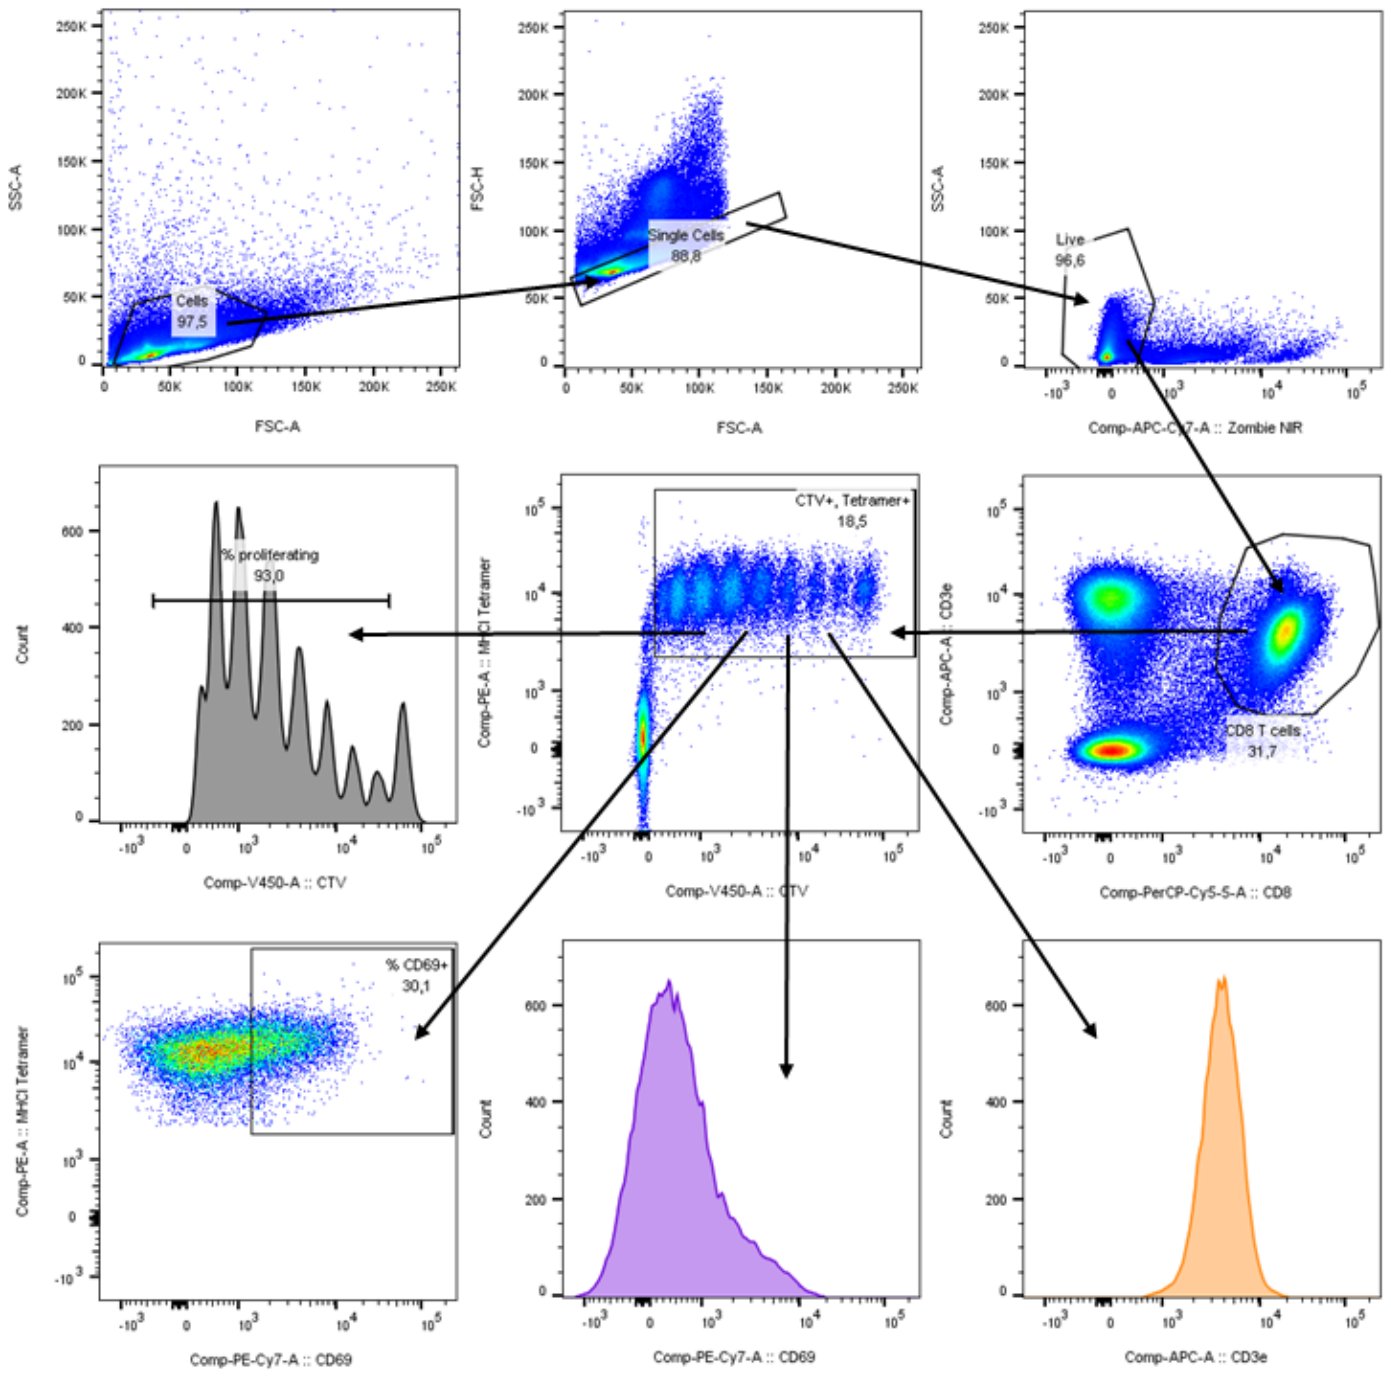

**Supplementary Figure 11.** Gating strategy used to analyze the data shown in Figure 6. A minimum of 10 000 cells were acquired within the CTV=Tetramer<sup>+</sup> gate. The gate for CD69<sup>+</sup> cells was set based on the unstimulated control. Proliferation histograms were generated in FlowJo v7.6.5.

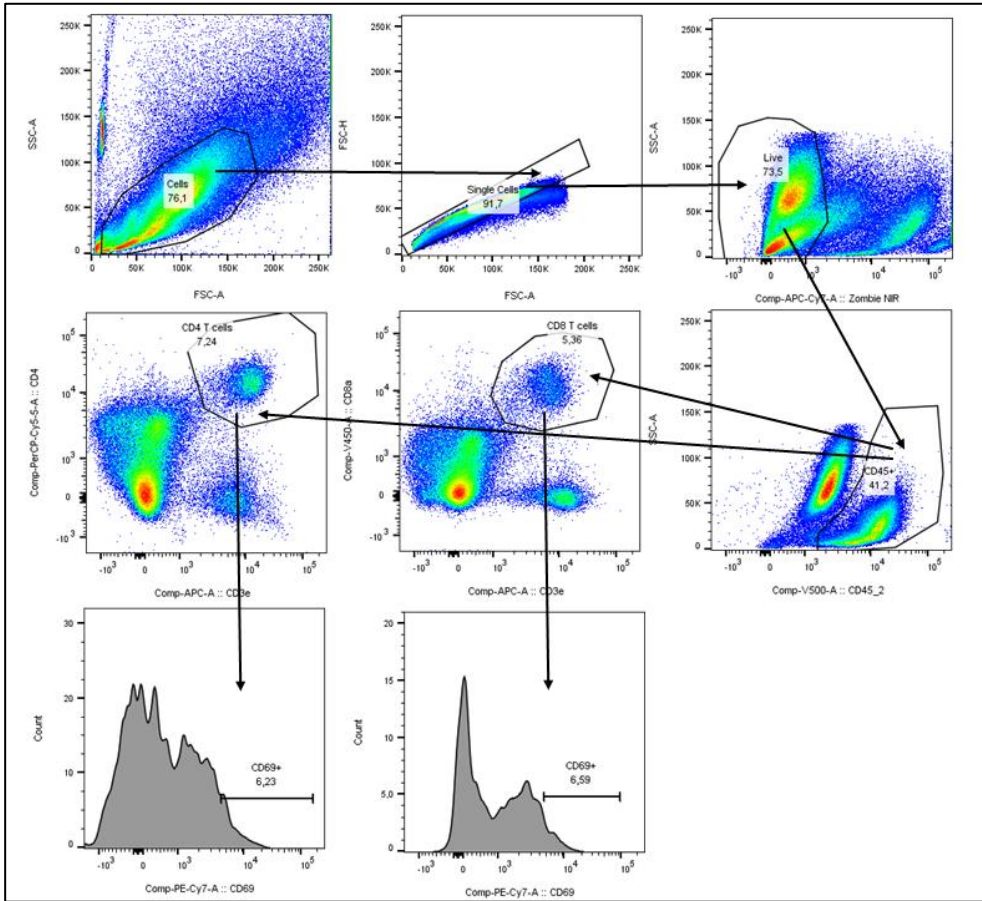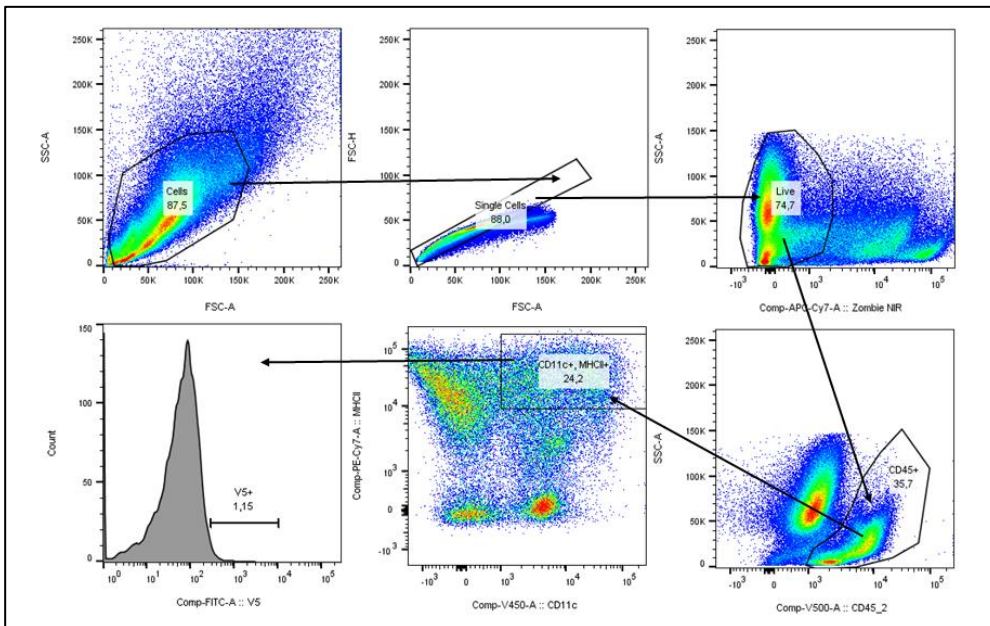

**Supplementary Figure 12.** Gating strategy used to analyze the data shown in Figure 7b (upper panel) and Figure 7c (lower panel). A minimum of 20 000 cells (Figure 7b) or 50 000 cells (Figure 7c) were acquired within the CD45<sup>+</sup> gate. Gates for CD69<sup>+</sup> cells and V5<sup>+</sup> cells were set based on FMO controls. Proliferation histograms were generated in FlowJo v7.6.5.
